# Supplementary material for: Crystalline oxygen-bridged carbon nitride from self-assembled supramolecular intermediate for efficient photocatalytic H2 evolution
Source: Royal Society of Chemistry journal article supplement (doi:10.1039/d3ta06289a), 2023-12-28
Supplement: d3ta06289a1.pdf [file d3ta06289a1.pdf]

## Supporting Information

### **Crystalline oxygen-bridged carbon nitride from Self-assembles supramolecular for efficient photocatalytic H<sub>2</sub> evolution**

Guangzheng Huang,<sup>a</sup> Bowen Xiao,<sup>b</sup> Liyan Bao,<sup>a</sup> Dengke Wang,<sup>c</sup> Yannan Luo,<sup>a</sup> Shicheng Yan,<sup>\*d</sup> and Honglin Gao<sup>\*a</sup>

*<sup>a</sup> School of Materials and Energy, National Center for International Research on Photoelectric and Energy Materials, Yunnan University, Kunming 650091, China. E-mail: [hlgao@ynu.edu.cn](mailto:hlgao@ynu.edu.cn)*

*<sup>b</sup> Department of Physics, Fudan University, Shanghai 200433, China*

*<sup>c</sup> Department of Physics, Center for Optoelectronics Engineering Research, Yunnan University, 650091 Kunming, China*

*<sup>d</sup> Eco-Materials and Renewable Energy Research Center (ERERC), College of Engineering and Applied Sciences, Nanjing University, Nanjing 210093, China. E-mail: [yscfei@nju.edu.cn](mailto:yscfei@nju.edu.cn)*

#### **Synthesis of CMe supramolecular**

All reagents in this study were used without additional purification and purchased from Sigma-Aldrich or Macklin. The precursor of melem was obtained through a polymerization process involving the heating of melamine, as previously documented.<sup>[1]</sup> Stoichiometric quantities of cyanuric acid (CA) and melem (Me) were dispersed in an ethanol solvent and subjected to ultrasonic agitation for 1 hour. The resulting suspensions were subsequently transferred to a three-necked flask and subjected to reflux at 80 °C for 4 hours. The resulting white suspensions were centrifuged, washed with ethanol, deionized water, and ultimately freeze-dried to yield a white powder. The synthesized supramolecular compounds were denoted as CMe<sub>21</sub>, CMe<sub>32</sub>, CMe<sub>65</sub>, CMe<sub>11</sub>, and CMe<sub>12</sub>, with the numerical notations signifying the molar ratios of CA and Me used in the synthesis reaction.

## **Synthesis of CMe<sub>x</sub>-CN**

The synthesis of CMe<sub>x</sub>-CN involved a conventional thermal polymerization process. Typically, a 1g CMe<sub>32</sub> supramolecular intermediate was calcined in an alumina crucible coated with aluminum foil, positioned within a tubular furnace. This calcination was carried out at 550 °C for 4 h, using a heating rate of 2.3 °C/min under nitrogen gas flow. The product was labeled as CMe<sub>32</sub>-CN. In accordance with the nomenclature established for the supramolecular precursors, the resulting series of samples were named CMe<sub>x</sub>-CN (x= 21, 65, 11, 12 respectively). For comparison, the g-C<sub>3</sub>N<sub>4</sub>, Me-CN and CAME-CN were similarly synthesized under identical condition through the thermal polymerization of melamine, melem and a CA-melem mixture with molar ratio of 3:2, respectively.

## **Characterizations and photoelectrochemical test**

The crystallinity of the samples was assessed by X-ray diffraction utilizing a Smart Lab SE equipped with Cu-K $\alpha$  radiation ( $\lambda=1.541 \text{ \AA}$ , 40KV, 30 mA). Fourier transforms infrared spectra (FTIR) were recorded using a Bruker VERTEX 700 spectrometer. Thermogravimetric analysis and differential scanning calorimetry (TGA-DSC) were carried out on a METTLER TGA/DSC/HT1600 thermal analyzer. X-ray photoelectron spectroscopy (XPS) was performed utilizing the Thermo Fisher Scientific model k-alpha<sup>+</sup>. Quantitative element analysis was conducted using the Vario EL III element analyzer (Germany). The morphology and microstructure were characterized by field emission scanning electron microscopy (SEM, Nova NanoSEM 450) and transmission electron microscopy (TEM, ThermoFisher Talos F200X). The UV-relative diffuse reflectance spectrum (DRS) was obtained using BaSO<sub>4</sub> as a reference on a UV-2600 spectrophotometer. Photoluminescence spectra and transient fluorescence lifetime were recorded on a fluorescence spectrophotometer (FLS920). The photoelectrochemical performance was evaluated using an electrochemical workstation (Wuhan Corrtest, CS2350H) with Ag/AgCl as the reference electrode, platinum flake as the counter electrode, and photocatalyst-coated FTO glass as the working electrode. The working electrode was prepared as followed: 5 mg of samples and 7 mg of iodine were dispersed in 20 mL of acetone and subjected to ultrasonication for 1h to obtain

a suspension. Then, the samples were electrodeposited onto pre-cleaned FTO glass using the electrochemical workstation and then dried for 4 h at 80 °C to yield the working electrode. <sup>13</sup>C CP/MAS NMR spectra were recorded at room temperature by using a 3.2 mm MAS probe and a MAS spinning rate of 10kHz. A contact time of 20 ms and a recycle delay of 2 s were used for the <sup>1</sup>H–<sup>13</sup>C CP/MAS measurement.

### Photocatalytic H<sub>2</sub> evolution experiments

Photocatalytic H<sub>2</sub> evolution experiments were conducted using the Labsolar 6A system, an all-glass automatic closed-cycle setup by Beijing Perfect Light. Specifically, 50 mg of catalyst powder was dispersed in 87 mL of deionized water, with the 10 mL of triethanolamine (TEOA) as a sacrificial agent and 3 mL of an aqueous solution of H<sub>2</sub>PtCl<sub>6</sub>·6H<sub>2</sub>O (1wt% Pt) as cocatalyst. Following ultrasonic treatment for 5 min, the suspension was transferred to a 200 mL quartz glass reactor and continuously stirred via a magnetic agitator. Prior to illumination with a 300 W Xe light source (Beijing Aulight Technology Co.) equipped with a cut-off filter ( $\lambda > 420$  nm), the circulatory system underwent a 15 min vacuuming process. The amount of H<sub>2</sub> evolution was analyzed using a gas chromatograph (Zhejiang Fuli 9790 II) equipped with a thermal conductivity detector (TCD) and employing high-purity Ar as the carrier gas. The apparent quantum efficiency (AQE) of the catalyst under monochromatic light at different wavelengths (420 nm, 450 nm, 500 nm) was calculated using the following formula:

$$AQE = \frac{2 \times \text{number of hydrogen molecules}}{\text{number of incident photon}} \times 100\% = \frac{2 \times M \times N_A \times h \times c}{S \times P \times t \times \lambda} \times 100\%$$

Where, M is the number of H<sub>2</sub> molecules (mol), N<sub>A</sub> denotes Avogadro constant (6.022\*10<sup>23</sup> mol<sup>-1</sup>), h is Planck constant, c is the speed of light (3\*10<sup>8</sup> m·s), S indicates the irradiation area (cm<sup>-1</sup>), P represents the power density of irradiation light (w·cm<sup>-2</sup>),  $\lambda$  signifies the irradiation wavelength (m), and t (s) is the reaction time.

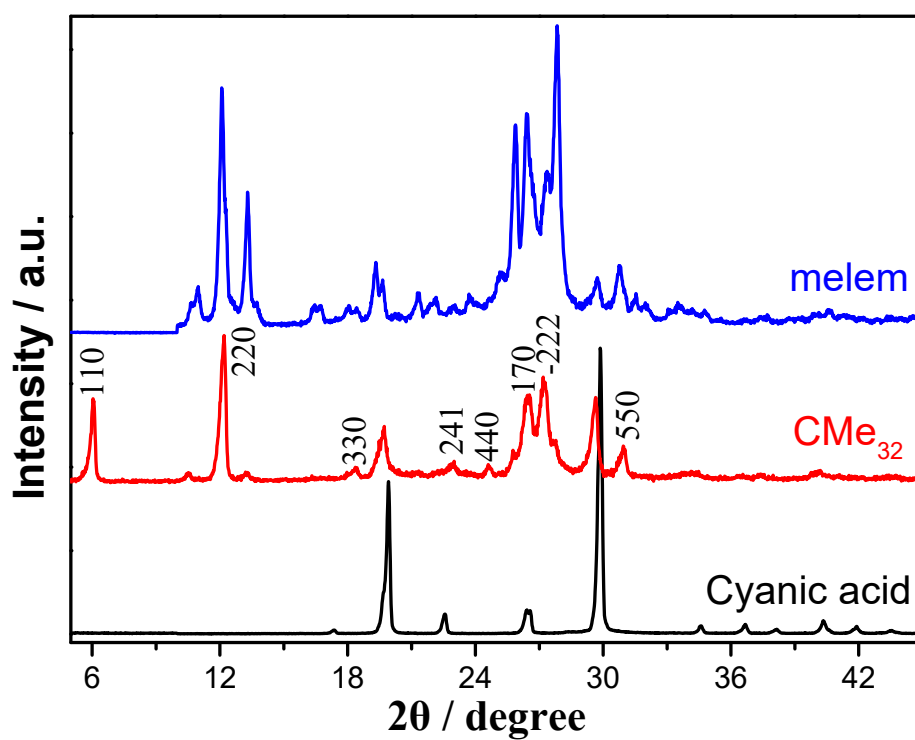

Figure S1. XRD patterns of melem, CMe<sub>32</sub>, and Cyanic acid (CA).

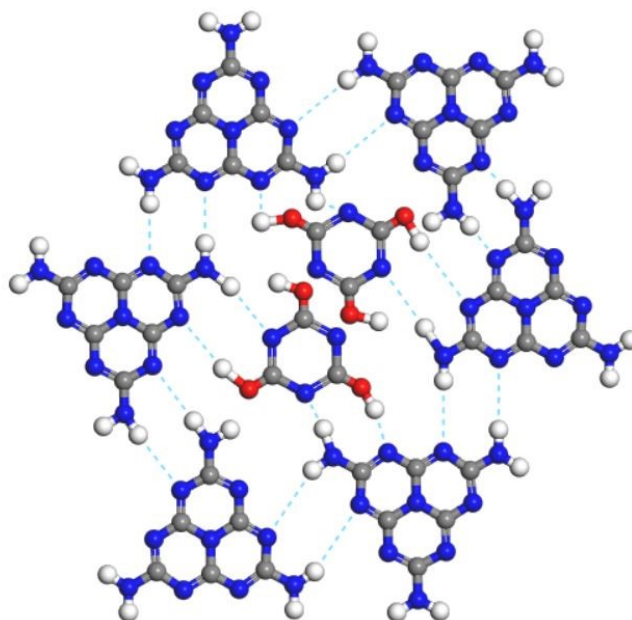

Figure S2. Schematic illustration of CMe<sub>32</sub> supramolecular unit assembly of Cyanic acid (CA) with melem via H-bond formation.

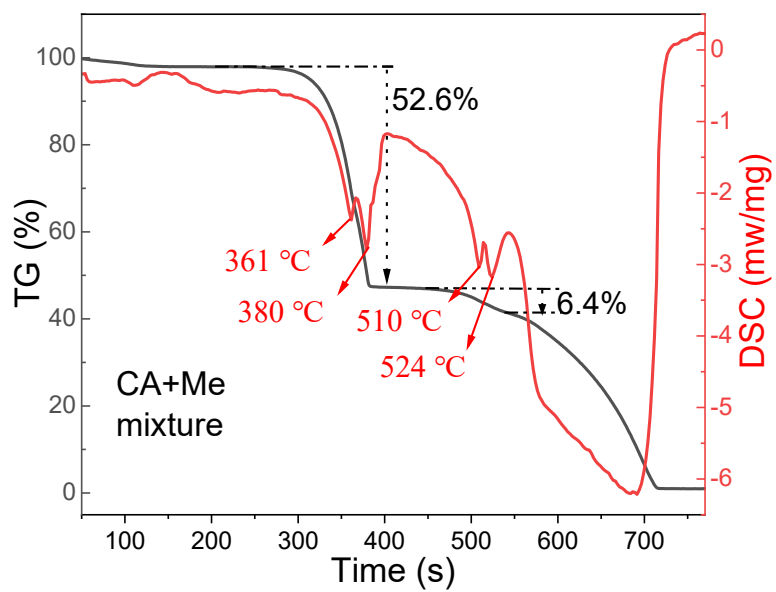

**Figure S3.** TG-DSC curve of CA-Me mixture.

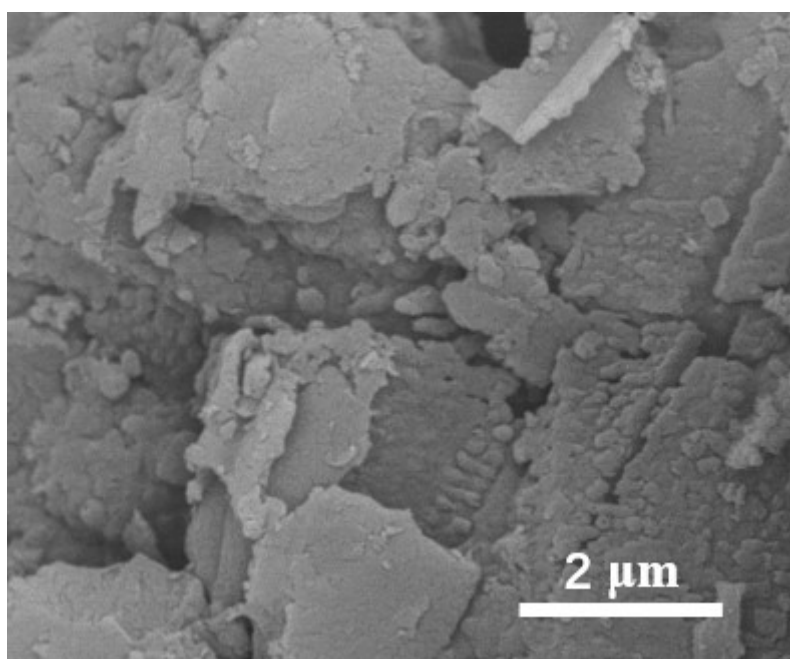

**Figure S4.** SEM image of pristine g-C<sub>3</sub>N<sub>4</sub>.

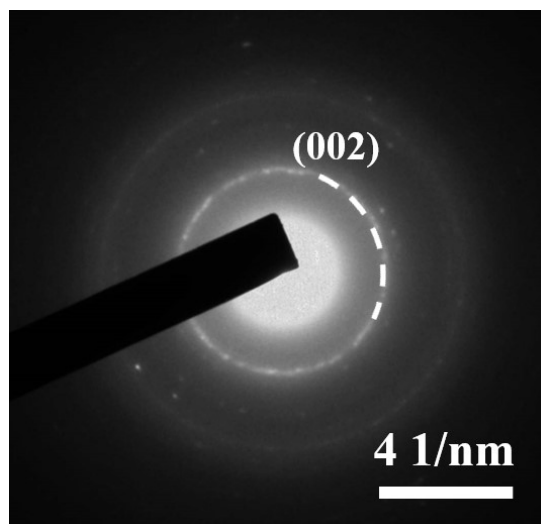

Figure S5. Selected area electron diffraction patterns of CMe<sub>32</sub>-CN

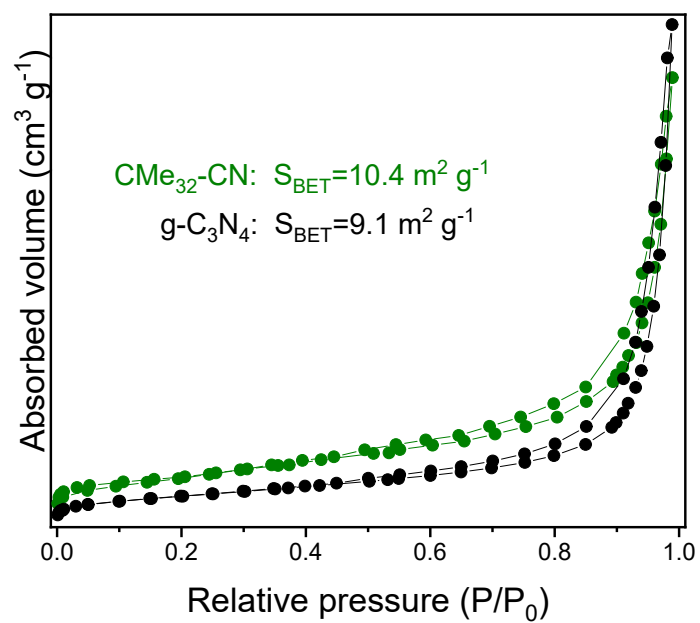

Figure S6. Nitrogen adsorption-desorption isotherms and specific surface area analysis according to the Brunauer–Emmett–Teller (BET) model for g-C<sub>3</sub>N<sub>4</sub> and CMe<sub>32</sub>-CN.

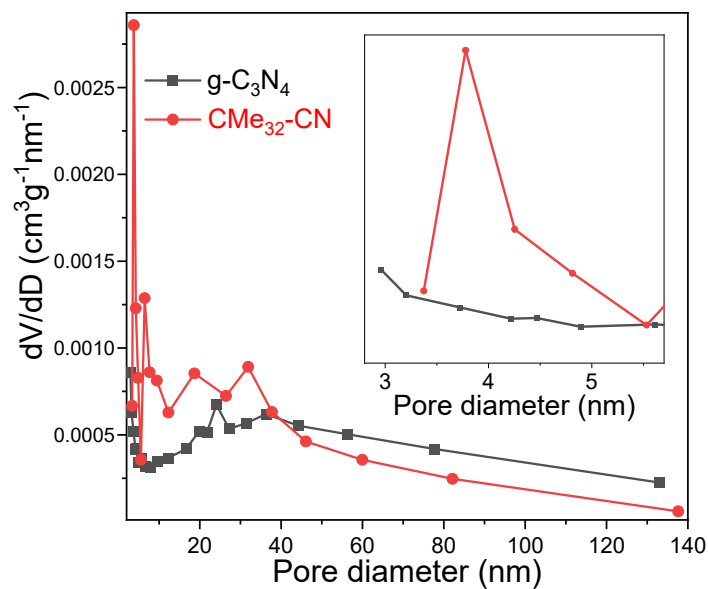

**Figure S7.** Nitrogen adsorption-desorption isotherms and specific surface area analysis according to the Brunauer–Emmett–Teller (BET) model for  $g\text{-C}_3\text{N}_4$  and  $\text{CMe}_{32}\text{-CN}$ .

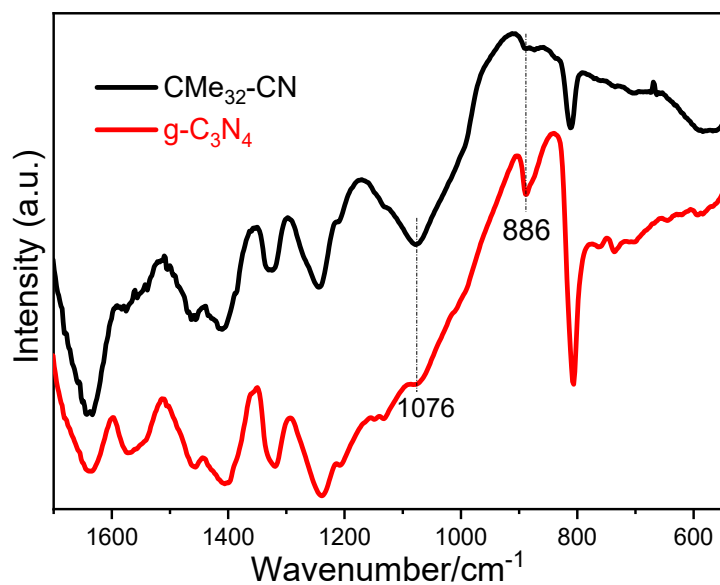

**Figure S8.** FTIR spectra at  $580\text{-}1650\text{ cm}^{-1}$  of  $\text{CMe}_{32}\text{-CN}$  and  $g\text{-C}_3\text{N}_4$ .

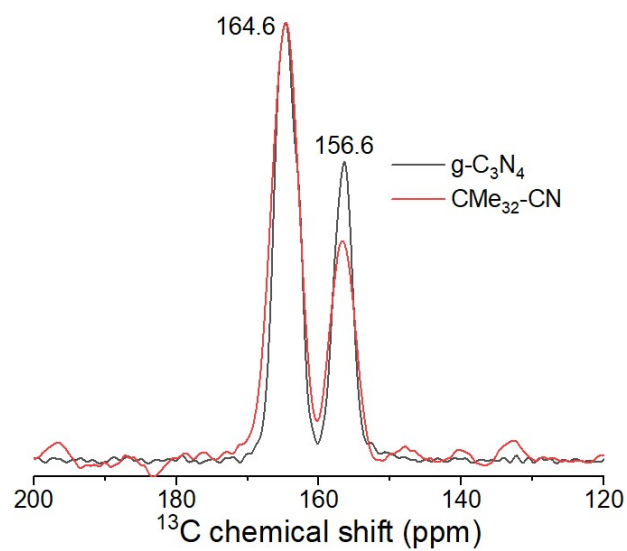

**Figure S9.** Solid-state NMR  $^{13}\text{C}$  spectra of  $\text{CMe}_{32}\text{-CN}$  and  $\text{g-C}_3\text{N}_4$ .

**Table S1.**  $\text{CMe}_{32}\text{-CN}$  and  $\text{g-C}_3\text{N}_4$  element analysis results (%).

| Sample                      | C    | N    | H    | O     |
|-----------------------------|------|------|------|-------|
| $\text{g-C}_3\text{N}_4$    | 35.2 | 58.7 | 1.68 | 4.45  |
| $\text{CMe}_{32}\text{-CN}$ | 31.1 | 49.9 | 1.53 | 17.43 |



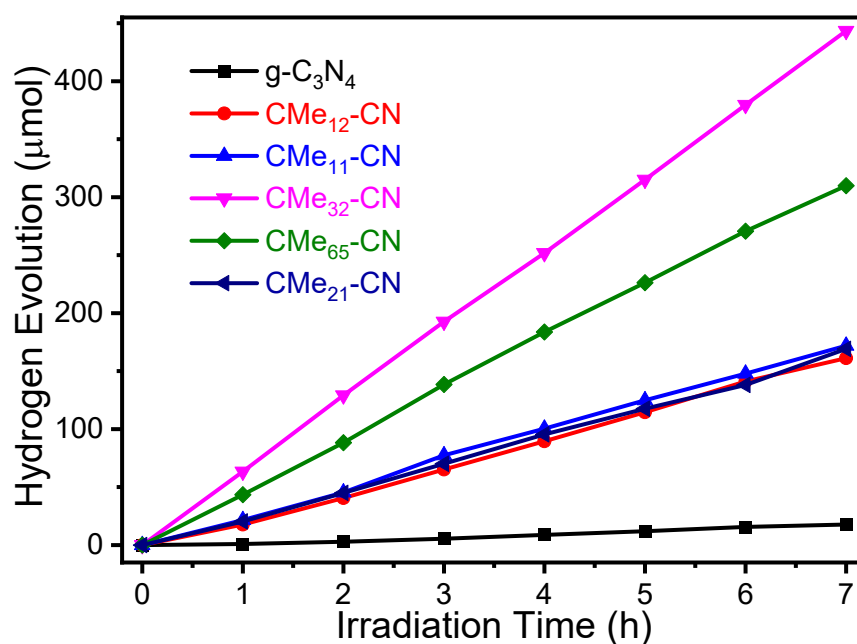

**Figure S10.** Time course of H<sub>2</sub> evolution for g-C<sub>3</sub>N<sub>4</sub> and CMe<sub>x</sub>-CN under visible light irradiation.

**Table S2.** Photocatalytic H<sub>2</sub> evolution activity of partially been reported via facile strategy for doping and crystalline graphitic carbon nitride photocatalysts recently.

| Photocatalyst                                           | strategy                                                             | HER > 420 nm<br>(sample doses) | AQY /%                       | Reference |
|---------------------------------------------------------|----------------------------------------------------------------------|--------------------------------|------------------------------|-----------|
| ONLH-600                                                | Oxygen linker OCN                                                    | 337 μmol/h·g                   | 10.3 at 420 nm               | [2]       |
| OCN                                                     | Multiple thermal treatment strategy for hollow O-doping CN nanosheet | 36 μmol/h                      | 4.28 at 420 nm               | [3]       |
| CN-HT                                                   | Intramolecular heterostructured with heptazine-triazine              | 64.88 μmol/h                   | 10.1 at 400 nm               | [4]       |
| 5% K-PHI/B <sub>0.8</sub> ST                            | K <sup>+</sup> intercalated act as charge-transfer bridge            | 87.0 μmol/h                    | 8.05 at 420 nm               | [5]       |
| (K)PCN&KTO                                              | multilocal gradient-doping K <sup>+</sup> CN                         | 191.5 μmol/h                   | 10.4 at 420 nm               | [6]       |
| PTI-Rh/Cr <sub>2</sub> O <sub>3</sub> -CoO <sub>x</sub> | Bottom-up fabricate single-crystalline PTI nanosheet                 | λ > 300 nm<br>610 μmol/h       | 25 at 365 nm<br>~1 at 400 nm | [7]       |
| CMe <sub>32</sub> -CN                                   | CA-Me supramolecular synthesize crystalline oxygen-bridged CN        | 64.7 μmol/h                    | 13.2 at 420 nm               | This work |

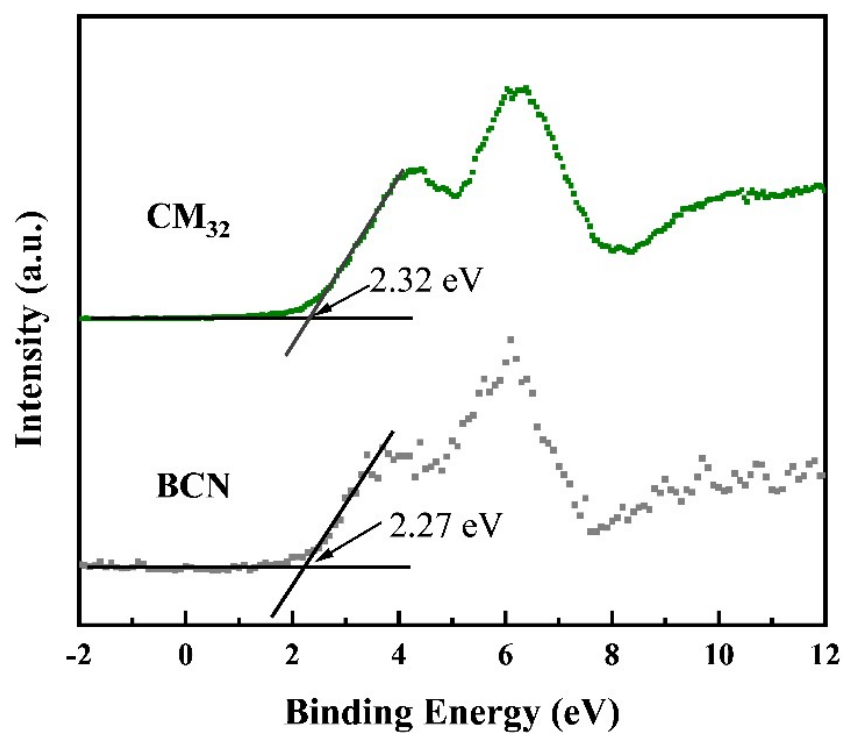

**Figure S11.** XPS valence band spectra of  $CM_{e32}$ -CN and g- $C_3N_4$ .

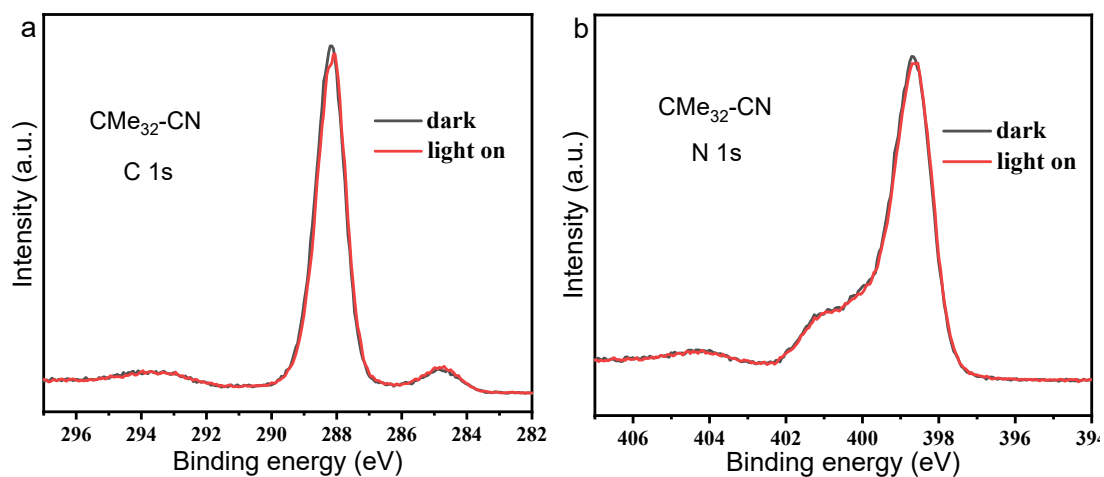

**Figure S12.** High-resolution in-situ XPS spectra of C 1s (a) and N 1s (b) of  $CM_{e32}$ -CN.

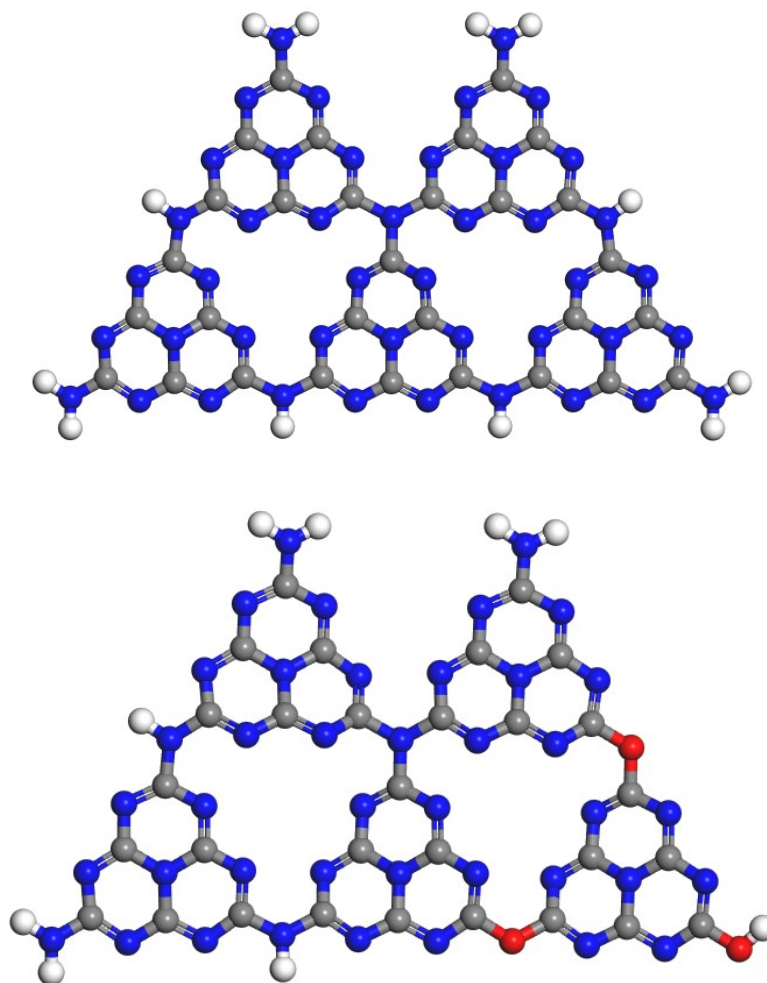

**Figure S13.** Models of g-C<sub>3</sub>N<sub>4</sub> (top) and CMe<sub>32</sub>-CN (bottom) using in the first-principle calculations.

#### Reference

- [1] L. Bao, Y. Liu, Z. Yu, Y. Xue, S. Yan, H. Gao, *Mater. Today Chem.*, 2022, **26**, 101084.
- [2] Y. Wang, M. K. Bayazit, S. J. A. Moniz, a Q. Ruan, C. C. Lau, N. Martsinovich, J. Tang, *Energy & Environmental Science* **2017**, *10*, 1643.
- [3] Y. Wu, P. Xiong, J. Wu, Z Huang , J Sun , Q. Liu , X. Cheng , J. Yang, J. Zhu, Y Zhou, *Nano-Micro Letters* **2021**, *13*, 48.
- [4] X. Ruan, X. Cui, G. Jia, J. Wu, J. Zhao, D. J. Singh, Y. Liu, H. Zhang, L. Zhang, W. Zheng, *Chemical Engineering Journal* **2022**, *428*, 132579.
- [5] M. Wang, Z. Zhang, Z. Chi, L.-l.Lou, H. Li, H. Yu, T. Ma, K. Yu, H. Wang, *Advanced Functional Materials* **2023**, *33*, 2211565.
- [6] J. Yan, W. Fang, Z. Wei, J. Chi, M. Chen, Z. Jiang, K. Jiang, S. Shen, W. Shangguan, *Applied Catalysis B: Environmental* **2023**, *339*, 123155.
- [7] M. Liu, G. Zhang, X. Liang, Z. Pan, D. Zheng, S. Wang, Z. Yu, Y. Hou, X. Wang, *Angewandte Chemie International Edition* **2023**, *62*, e202304694.
